# Supplementary material for: The facile co-precipitation synthesis of strontium tungstate anchored on a boron nitride (SrWO4/BN) composite as a promising electrocatalyst for pharmaceutical drug analysis
Source: Royal Society of Chemistry journal article supplement (doi:10.1039/c9nj05673d), 2020-01-01
Supplement: c9nj05673d1.pdf [file c9nj05673d1.pdf]

**Supporting Information**

**Facile co-precipitation synthesis of strontium tungstate anchored on boron nitride (SrWO<sub>4</sub>/BN) composite as a promising electrocatalyst for pharmaceutical drug**

**Balamurugan Muthukutty,<sup>a</sup> Alagumalai Krishnapandi,<sup>a</sup> Shen-Ming Chen<sup>a\*</sup>**

<sup>a</sup>Electroanalysis and Bioelectrochemistry Lab, Department of Chemical Engineering and Biotechnology, National Taipei University of Technology, No. 1, Section 3, Chung-Hsiao East Road, Taipei 106, Taiwan, ROC.

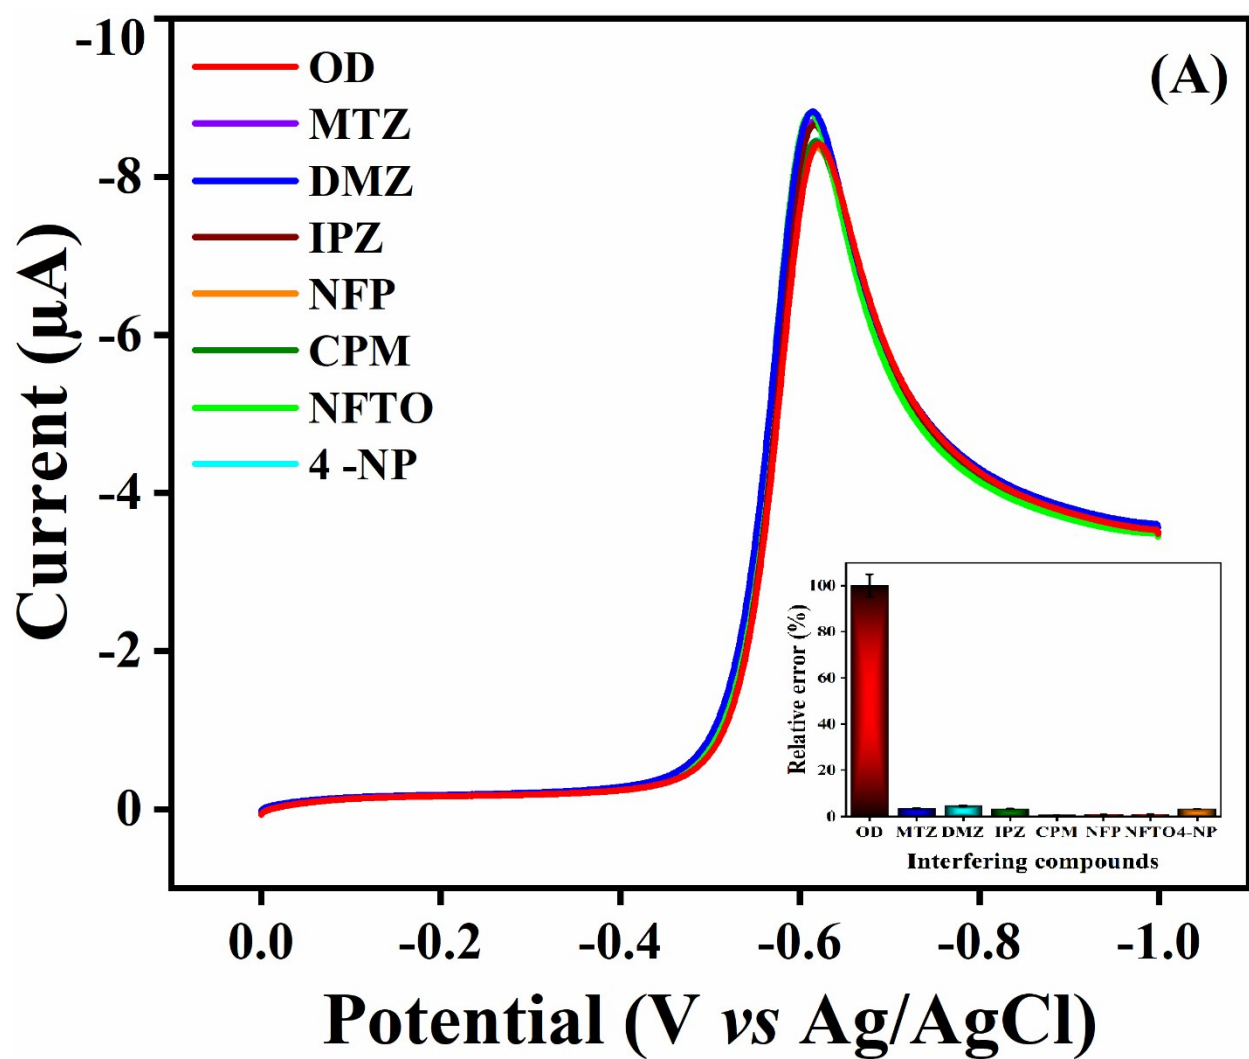

**S1 A.** LSV current response for different interference compounds (OD, MTZ, DMZ, IPZ, CPM, NFP, NFTO and 4-NP) at 100  $\mu\text{M}$  concentration in PBS (pH = 7.0). (D) corresponding relative error bar graph for interfering compounds vs Current ( $\mu\text{A}$ ).
